# Supplementary material
Source: PubMed Central journal article supplement (PMC4070031)
Supplement: 97320630010246S1.pdf [file 97320630010246S1.pdf]

## Supplementary material:

### Methodology:

#### Equations:

|     |                                                             |                                                                                                                                                                                                                                                                                                                             |
|-----|-------------------------------------------------------------|-----------------------------------------------------------------------------------------------------------------------------------------------------------------------------------------------------------------------------------------------------------------------------------------------------------------------------|
| (1) | $d_i(t) = \sum_{j=1}^N (x_j(t) - w_{ij}(t))^2$              | Where $d_i(t)$ is the Euclidean distance, $i$ is the neuron index, $j$ is the input node index, $N$ is the number of input signals (dimension of the input vector $x$ ), $x_j(t)$ is the input signal in node $j$ at iteration $t$ , and $w_{ij}(t)$ is the weight between input node $j$ and neuron $i$ at iteration $t$ . |
| (2) | $\Delta w_{ij} = n(t) \cdot h_{ik}(t) \cdot (x_j - w_{ij})$ | Where $\Delta w$ is the adjusted weight value, and $n(t)$ and $h_{ik}$ are the learning and neighborhood values for neuron grid update.                                                                                                                                                                                     |

**Table 1:** Organization of the sequenced samples according to the type of tissue, staging, and presence of GC

| Sample (Barcode) | Type of Tissue         | TNM* | Type of Gastric Cancer |
|------------------|------------------------|------|------------------------|
| 1                | Healthy Gastric Tissue | -    | -                      |
| 2                | Healthy Gastric Tissue | -    | -                      |
| 3                | Adjacent Tissue        | T1   | Intestinal             |
| 4                | Gastric Cancer Tissue  | T1   | Intestinal             |
| 5                | Adjacent Tissue        | T1   | Intestinal             |
| 6                | Gastric Cancer Tissue  | T1   | Intestinal             |
| 7                | Gastric Cancer Tissue  | T1   | Difuse                 |
| 8                | Adjacent Tissue        | T1   | Difuse                 |
| 9                | Gastric Cancer Tissue  | T4   | Intestinal             |
| 10               | Adjacent Tissue        | T4   | Intestinal             |

\* Tumor Node Metastasis

**Table 2:** Group of 76 miRNAs used as input for the artificial neural network.

| miRNA        |                          |              |              |
|--------------|--------------------------|--------------|--------------|
| hsa-mir-22   | hsa-mir-150              | hsa-mir-130a | hsa-let-7i   |
| hsa-mir-26b  | hsa-mir-215              | hsa-mir-182  | hsa-let-7b   |
| hsa-mir-590  | hsa-mir-1303             | hsa-mir-29c  | hsa-mir-558  |
| hsa-mir-455  | hsa-mir-16-1             | hsa-mir-30d  | hsa-mir-15a  |
| hsa-mir-660  | hsa-mir-223              | hsa-mir-126  | hsa-mir-143  |
| hsa-mir-2276 | hsa-mir-17               | hsa-mir-140  | hsa-mir-34a  |
| hsa-mir-574  | hsa-mir-28               | hsa-mir-3159 | hsa-mir-125a |
| hsa-mir-19a  | hsa-mir-195              | hsa-mir-31   | hsa-mir-192  |
| hsa-mir-145  | hsa-mir-107              | hsa-mir-425  | hsa-mir-148a |
| hsa-mir-93   | hsa-mir-378              | hsa-mir-30b  | hsa-mir-100  |
| hsa-mir-3929 | hsa-mir-1285-1           | hsa-mir-141  | hsa-mir-361  |
| hsa-mir-151  | hsa-mir-135b             | hsa-mir-342  | hsa-mir-15b  |
| hsa-mir-429  | hsa-mir-200c             | hsa-mir-200b | hsa-mir-619  |
| hsa-mir-10a  | hsa-mir-375              | hsa-mir-29a  | hsa-mir-378c |
| hsa-mir-222  | hsa-mir-30e              | hsa-let-7g   | hsa-mir-210  |
| hsa-mir-21   | hsa-mir-424              | hsa-mir-221  | hsa-mir-4284 |
| hsa-mir-23a  | hsa-mir-200 <sup>a</sup> | hsa-mir-25   | hsa-mir-3607 |
| hsa-mir-23b  | hsa-mir-484              | hsa-mir-451  | hsa-mir-199b |
| hsa-mir-1273 | hsa-mir-99 <sup>a</sup>  | hsa-mir-142  | hsa-mir-191  |
